# Supplementary material
Source: Copernicus journal article supplement (doi:10.5194/soil-12-715-2026)
Supplement: Supplementary file 1 [file soil-12-715-2026-supplement.pdf]

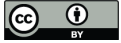

*Supplement of*

## **Plastic film residues on cropland: monitoring soil contamination through optical remote sensing**

**Alessandro Fabrizi et al.**

*Correspondence to:* Florian Wilken ([florian.wilken@uni-a.de](mailto:florian.wilken@uni-a.de))

The copyright of individual parts of the supplement might differ from the article licence.

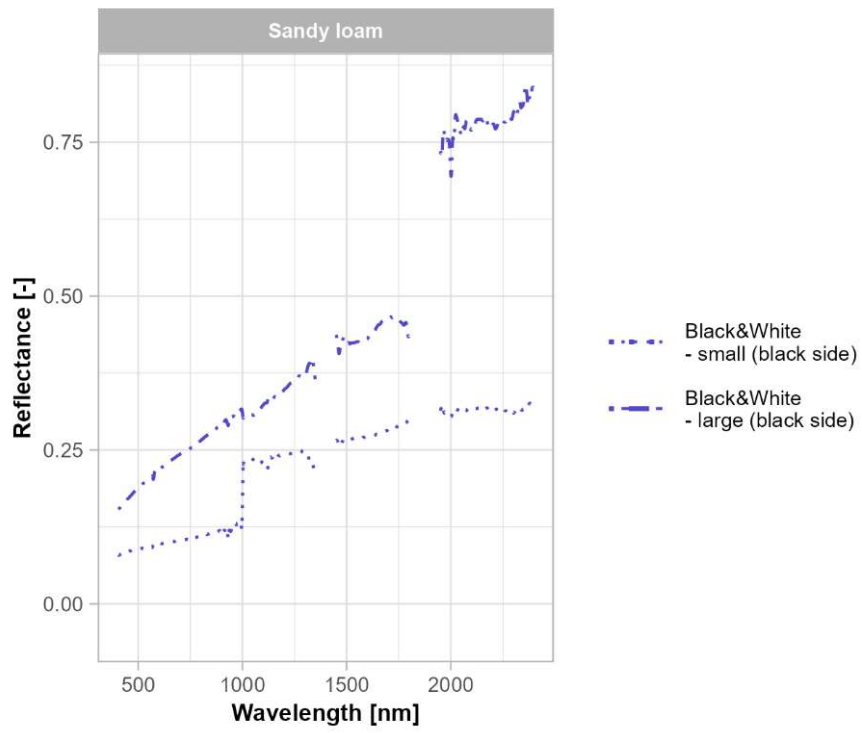

Figure S1 — Spectra of noisy measurements

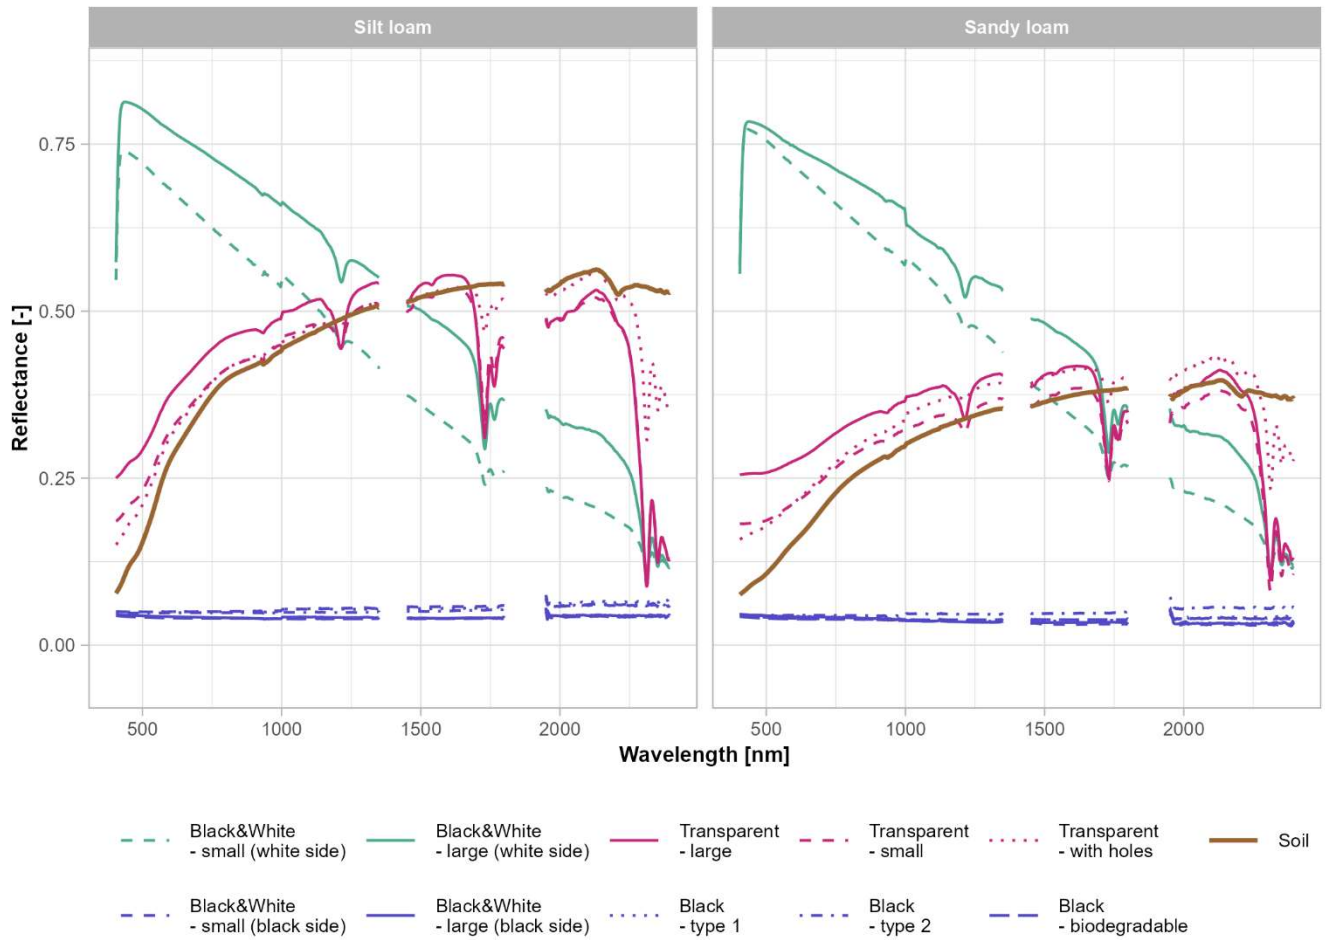

Figure S2 — Spectra of crumpled plastic films and of soils used as background. On the left side, spectra acquired on silt loam; on the right side, spectra acquired on sandy loam. Film colours are represented by different colours, and variation within film colours are represented by line shapes.

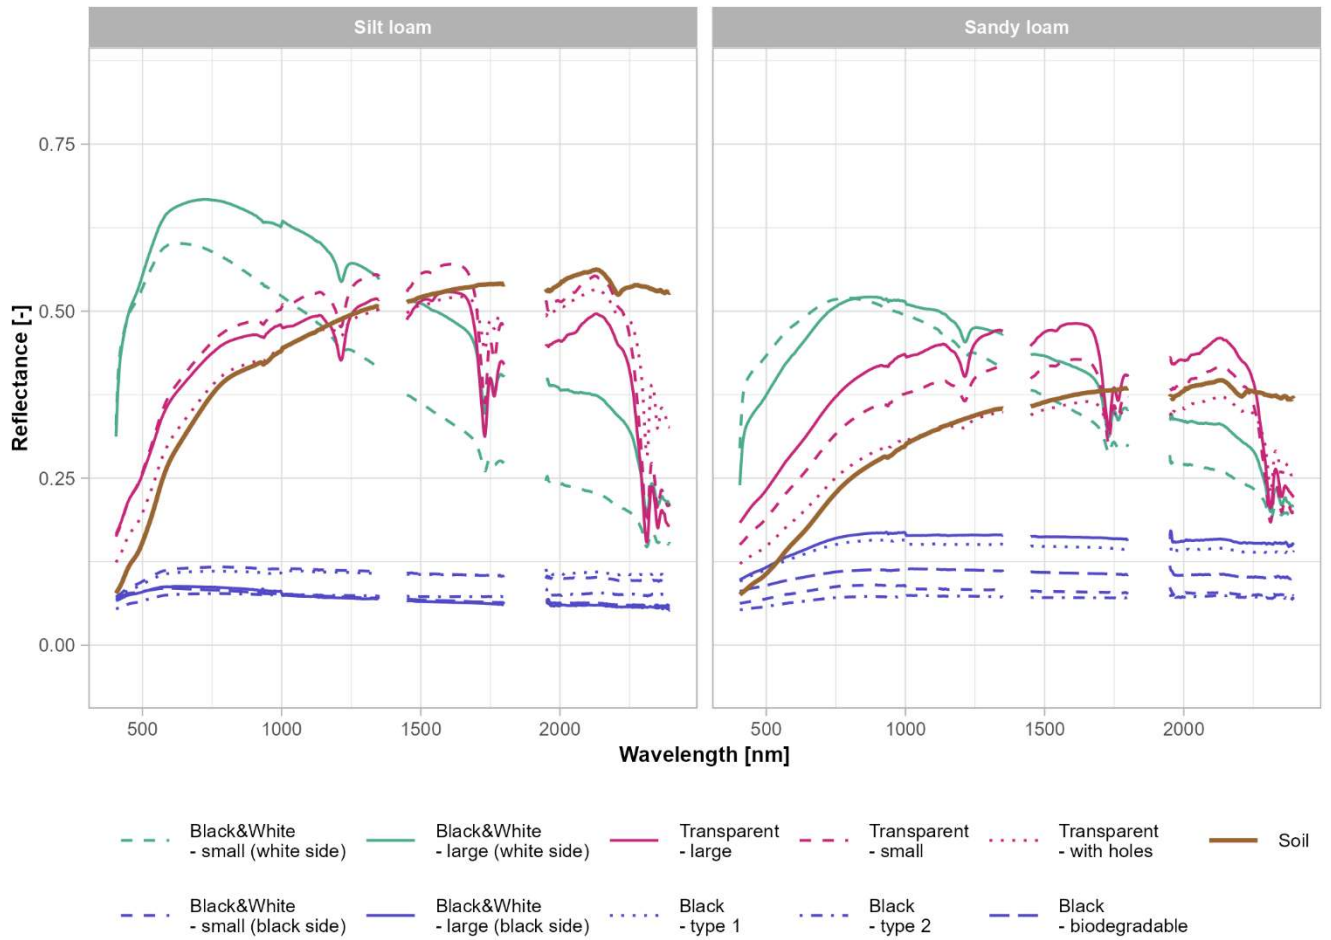

Figure S3 — Spectra of dirty plastic films and of soils used as background. On the left side, spectra acquired on silt loam; on the right side, spectra acquired on sandy loam. Film colours are represented by different colours, and variation within film colours are represented by line shapes.

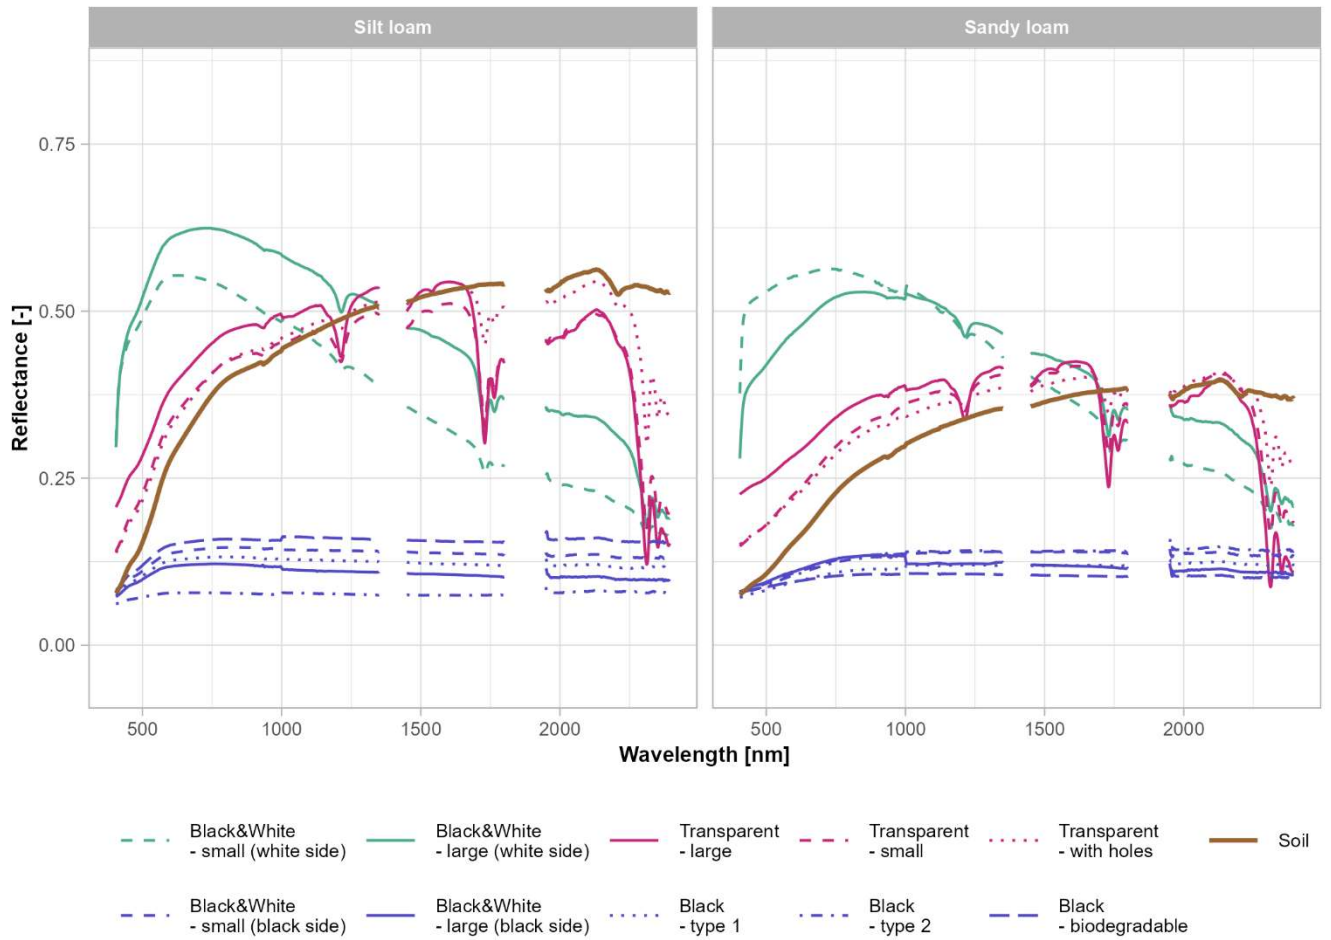

Figure S4 — Spectra of crumpled and dirty plastic films and of soils used as background. On the left side, spectra acquired on silt loam; on the right side, spectra acquired on sandy loam. Film colours are represented by different colours, and variation within film colours are represented by line shapes.

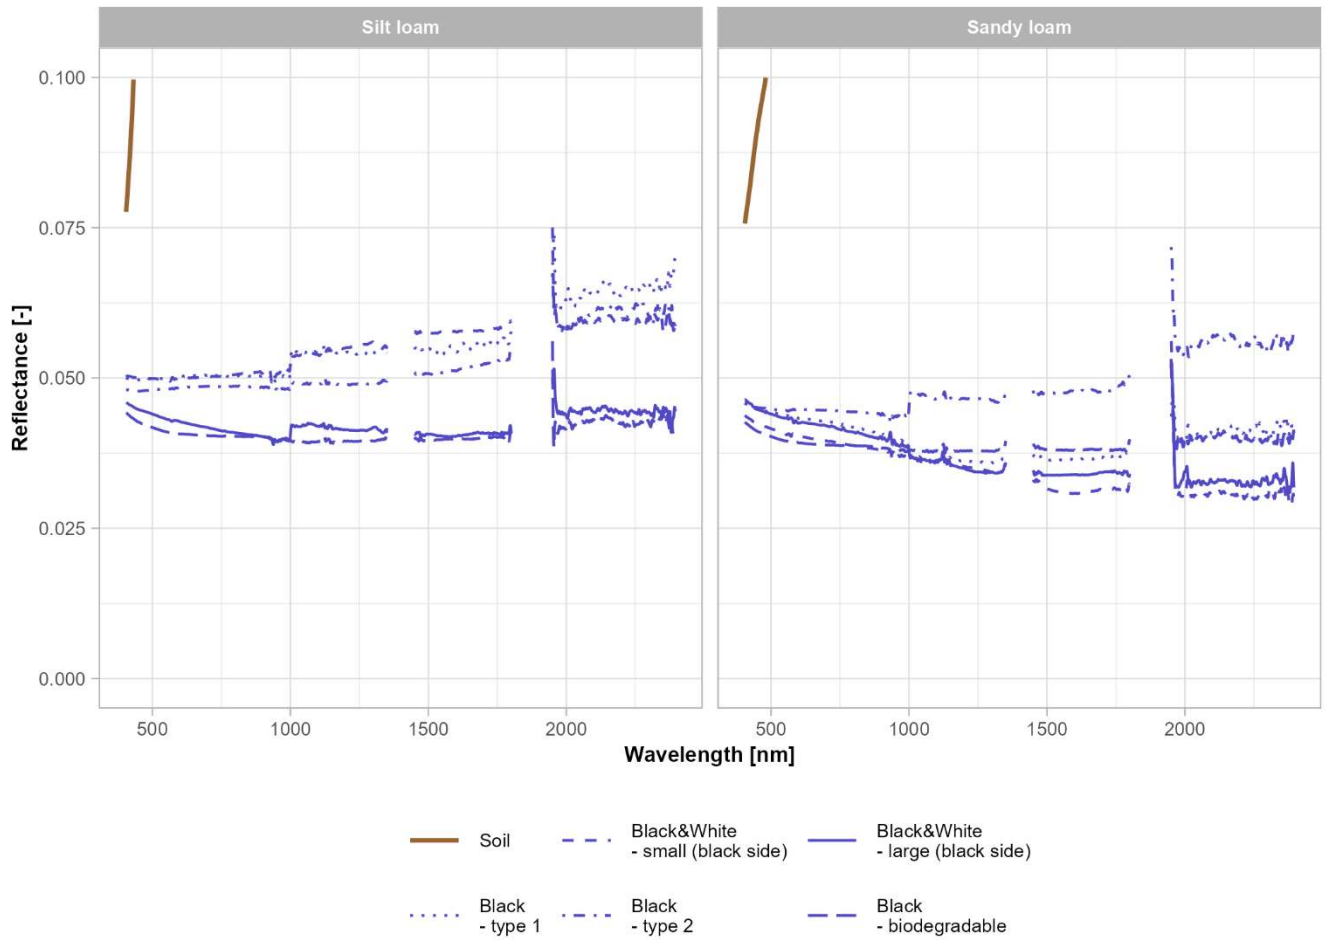

Figure S5 — Spectra of pristine black plastic films. On the left side, spectra acquired on silt loam; on the right side, spectra acquired on sandy loam.

Table S1 — Confusion matrix of the classification algorithm obtained with the multispectral 0.5 cm dataset. Variations in accuracy represent the standard deviation of within the 5-fold cross validation.

|                     |             | Classification    |                    |                |                |                   | <b>PA</b> |
|---------------------|-------------|-------------------|--------------------|----------------|----------------|-------------------|-----------|
|                     |             | Soil              | Black              | Transparent    | White          |                   |           |
| Ground observations | Soil        | 61.6 ±0.8         | 0.8 ±0.7           | 0 ±0           | 0 ±0           | 98.7 ±1.2%        |           |
|                     | Black       | 1.2 ±1.2          | 3 ±0.9             | 0 ±0           | 0 ±0           | 71.4 ±24.8%       |           |
|                     | Transparent | 0.6 ±0.8          | 0 ±0               | 3.2 ±0.7       | 0 ±0           | 84.2 ±20%         |           |
|                     | White       | 0.2 ±0.4          | 0 ±0               | 0 ±0           | 2.4 ±0.5       | 92.3 ±13.3%       |           |
| <b>UA</b>           |             | <b>96.9 ±2.9%</b> | <b>78.9 ±16.3%</b> | <b>100 ±0%</b> | <b>100 ±0%</b> | <b>96.2 ±2.8%</b> |           |
